# Supplementary material for: Personalized Tuberculosis Treatment Through Model-Informed Dosing of Rifampicin
Source: Springer Nature journal article supplement (doi:10.1007/s40262-018-00732-2), 2019-01-23

## Electronic Supplementary Materials

Title: Personalized tuberculosis treatment through model-informed dosing of rifampicin

Journal: Clinical Pharmacokinetics

Authors: Stijn W. van Beek<sup>1</sup>, Rob ter Heine<sup>1</sup>, Ron J. Keizer<sup>2</sup>, Cecile Magis-Escorra<sup>3</sup>, Rob E. Aarnoutse<sup>1</sup>, Elin M. Svensson<sup>1,4</sup>

Affiliations:

<sup>1</sup>Department of Pharmacy, Radboud Institute for Health Sciences, Radboud University Medical Center, Nijmegen, the Netherlands

<sup>2</sup>InsightRX, San Francisco, CA, USA

<sup>3</sup>Department of Respiratory Diseases, Radboud University Medical Center-Dekkerswald, Groesbeek, the Netherlands

<sup>4</sup>Department of Pharmaceutical Biosciences, Uppsala University, Uppsala, Sweden

Correspondence: [Elin.Svensson@radboudumc.nl](mailto:Elin.Svensson@radboudumc.nl), tel: +31 (0)24 309 25 95

### Captions

**ESM 1** Pubmed Search Strategy

**ESM 2** Goodness-of-fit plots for the models by Svensson *et al.* and Chirehwa *et al.* on the TDM and study data

**ESM 3** Visual predictive checks of the population pharmacokinetic models of rifampicin on **a)** the TDM data and **b)** the study data. The red lines represent the mean of the observed concentrations and the blue lines the 5<sup>th</sup> or 95<sup>th</sup> quartiles. The red and blue bands represent the 95% confidence interval of the mean and 5<sup>th</sup> or 95<sup>th</sup> quartiles respectively of the simulated concentrations

**ESM 4** Percentage difference in MAP estimates between InsightRX and NONMEM. Percentage difference was calculated with NONMEM as reference using:  $((\theta_{\text{IRX}} - \theta_{\text{NM}}) / \theta_{\text{NM}}) * 100\%$

**ESM 5** Difference in individual concentration predictions between InsightRX and NONMEM

## ESM 1

("Pharmacokinetics"[Mesh] OR "Pharmacokinetics"[tiab] OR "Drug Kinetics" [tiab] OR "Kinetics, Drug" [tiab] OR "Population-pharmacokinetics" [tiab] OR "Population-pharmacokinetic" [tiab] OR "Population pharmacokinetics" [tiab] OR "Population pharmacokinetic" [tiab])

AND

("Models, Statistical"[Mesh] OR "Statistical Model" [tiab] OR "Probabilistic Models" [tiab] OR "Model, Probabilistic" [tiab] OR "Models, Probabilistic" [tiab] OR "Probabilistic Model" [tiab] OR "Model, Statistical" [tiab] OR "Statistical Models" [tiab] OR "Models, Polynomial" [tiab] OR "Model, Polynomial" [tiab] OR "Polynomial Model" [tiab] OR "Polynomial Models" [tiab] OR "Two-Parameter Models" [tiab] OR "Model, Two-Parameter" [tiab] OR "Models, Two-Parameter" [tiab] OR "Two Parameter Models" [tiab] OR "Two-Parameter Model" [tiab] OR "Models, Binomial" [tiab] OR "Binomial Model" [tiab] OR "Binomial Models" [tiab] OR "Model, Binomial" [tiab] OR "Model" [tiab])

OR

("Computer Simulation"[Mesh] OR "Computer Simulations" [tiab] OR "Simulation, Computer" [tiab] OR "Simulations, Computer" [tiab] OR "Computerized Models" [tiab] OR "Computerized Model" [tiab] OR "Model, Computerized" [tiab] OR "Models, Computerized" [tiab] OR "Models, Computer" [tiab] OR "Computer Models" [tiab] OR "Computer Model" [tiab] OR "Model, Computer" [tiab] OR "In Silico" [tiab] OR "In Silicos" [tiab] OR "Silico, In" [tiab] OR "Silicos, In" [tiab] )

AND

("Rifampin"[Mesh] OR "Benemycin" [tiab] OR "Rifampicin" [tiab] OR "Rimactan" [tiab] OR "Tubocin" [tiab] OR "Rifadin" [tiab] OR "Rimactane" [tiab])

ESM 2

Smythe

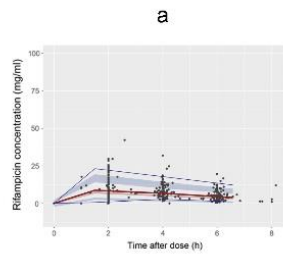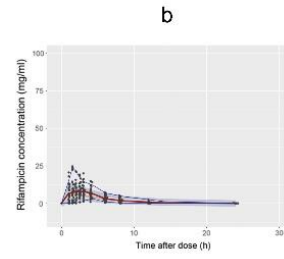

Savic

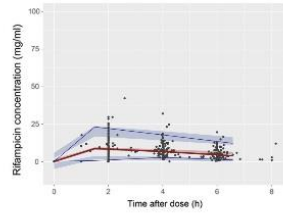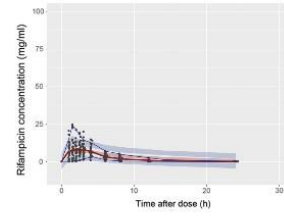

Segovia

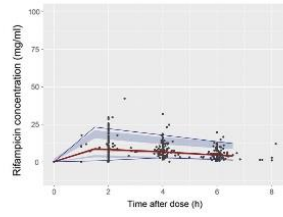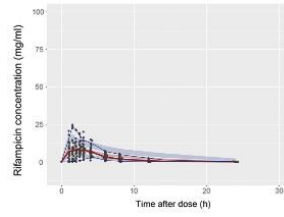

Jing

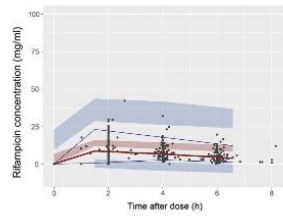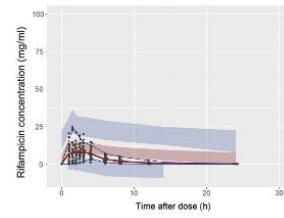

Seng

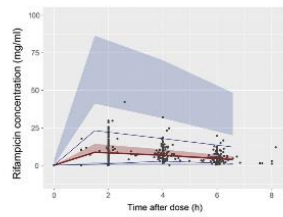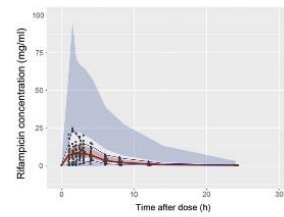

Chirehwa

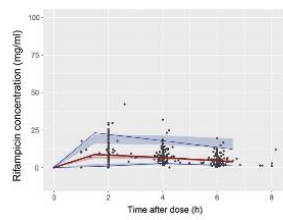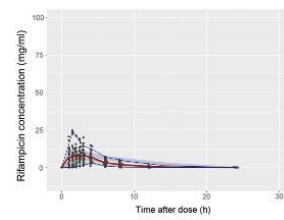

Svensson

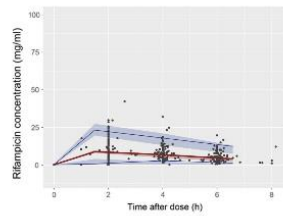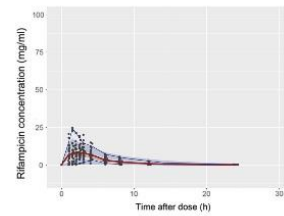

Wilkins

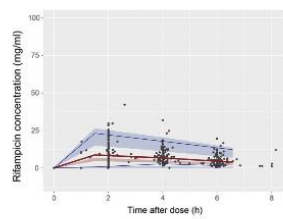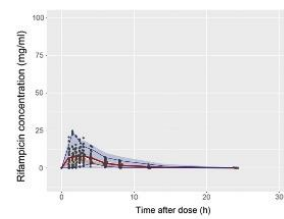

Schipani

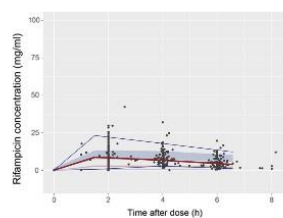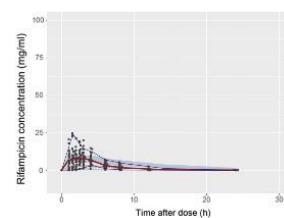

# ESM 3

## TDM data

## Study data

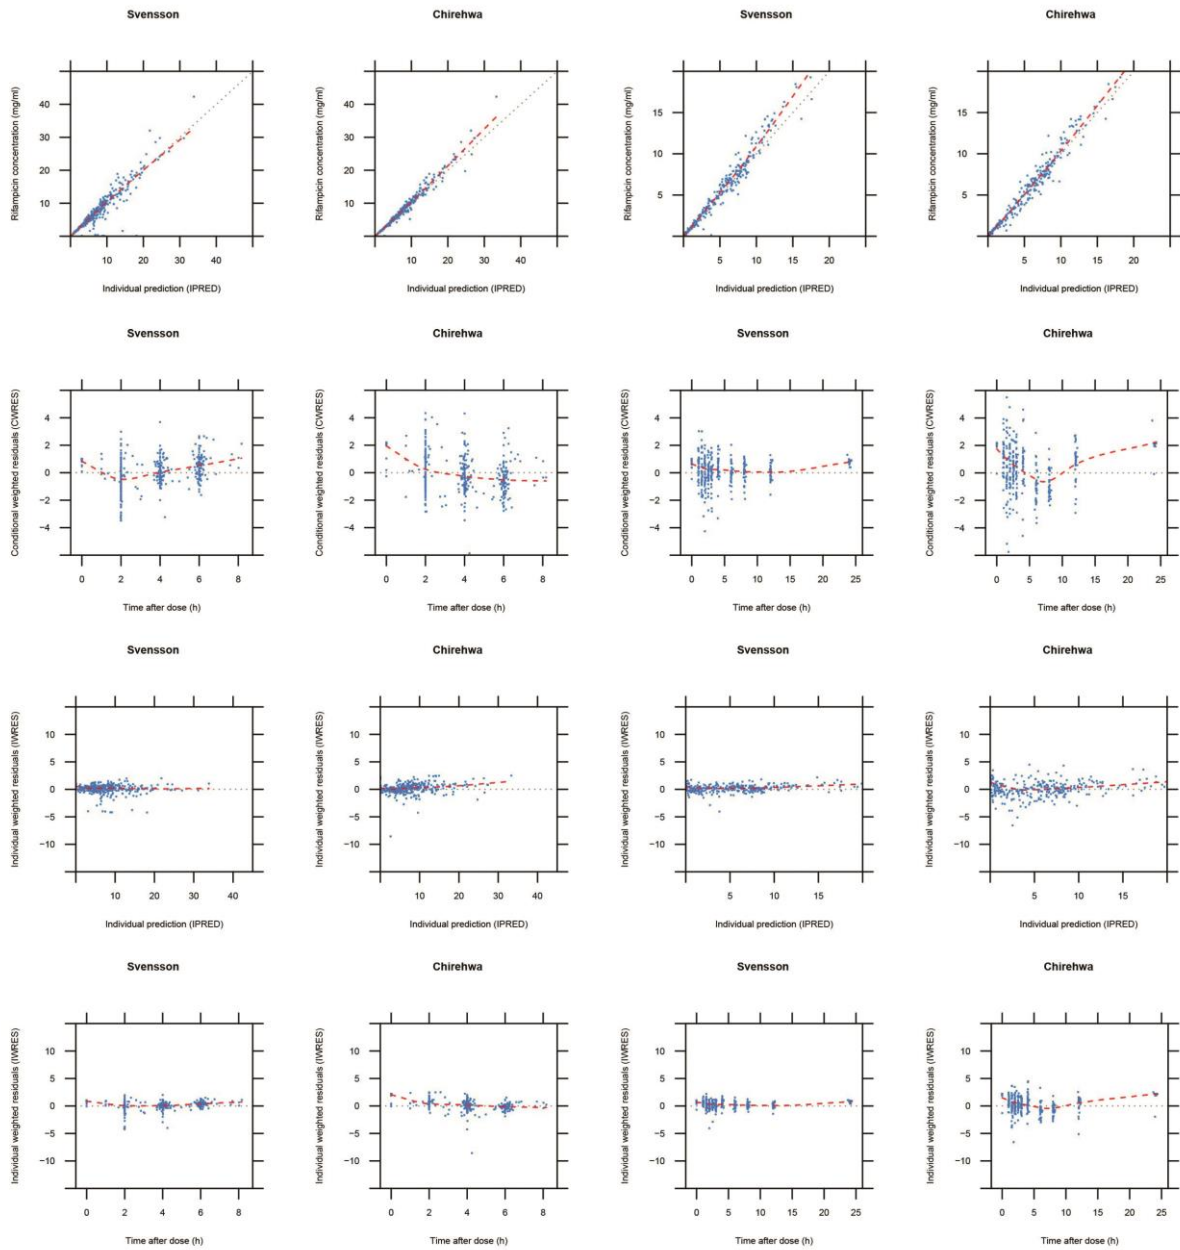

**ESM 4**

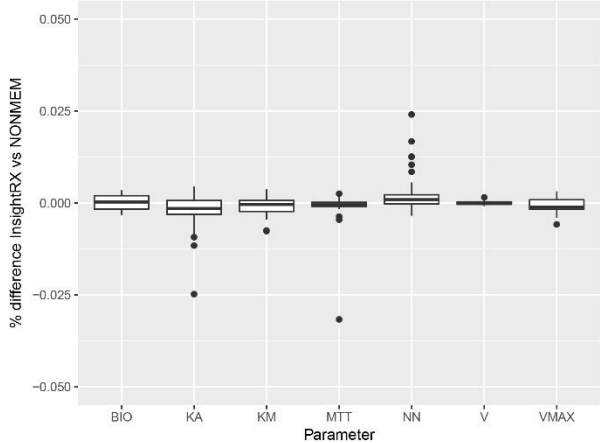

**ESM 5**

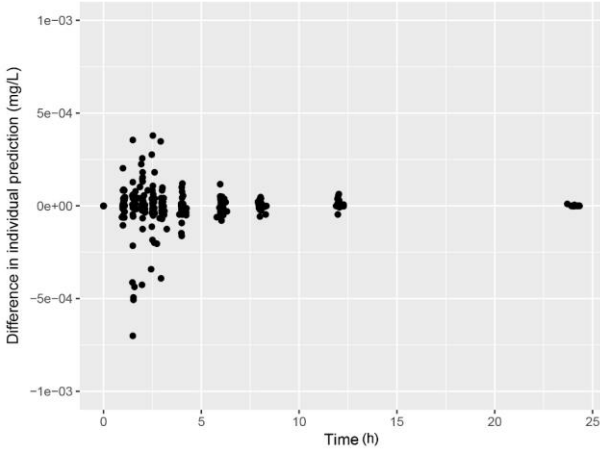

Supplement: MOESM1 [file 16415550]
